# Supplementary material for: Mg/Ca and δ 18 O in multiple species of planktonic foraminifera from 15 Ma to Recent
Source: Copernicus journal article supplement (doi:10.5194/egusphere-2024-1608), 2024-06-27
Supplement: Supplementary file 2 [file Supplementary Table 2.xlsx]

## Sheet: Mg-Ca Refs
Species	Author	Mg/Ca data Reference
Dentoglobigerina baroemoenensis	(Leroy, 1939)	None found
Dentoglobigerina larmeui	(Akers, 1955)	None found
Fohsella lobata	(Bermudez, 1949)	None found
Fohsella peripheroacuta	(Blow and Banner, 1966)	None found
Globigerinoides extremus	(Bolli and Bermudez, 1965)	None found
Globoconella conoidea	(Walters, 1965)	None found
Globoconella miozea	(Finlay, 1939)	None found
Globoconella puncticulata	(Deshayes, 1832)	None found
Globorotalia plesiotumida	Blow and Banner, 1965	None found
Globorotalia viola?	(Blow, 1969)	None found
Globoturborotalita nepenthes	(Todd, 1957)	None found
Globoturbotoralita woodi	(Jenkins, 1960)	None found
Menardella archeomenardii	(Bolli, 1957)	None found
Menardella pertenius	(Beard, 1969)	None found
Orbulina suturalis	Bronnimann, 1951	None found
Paragloborotalia continuosa	(Blow, 1959)	None found
Praeorbulina glomerosa	(Blow, 1956)	None found
Pulleniatina praecursor	(Banner and Blow, 1967)	None found
Pulleniatina primalis	Banner and Blow, 1967	None found
Sphaeroidinellopsis kochi	(Caudri, 1934)	None found
Sphaeroidinellopsis paenedehiscens	(Blow, 1969)	None found
Sphaeroidinellopsis seminulina	(Schwager, 1866)	None found
Truncorotalia oceanica	(Cushman and Bermudez, 1949)	None found
Truncorotalia tosaensis	(Takayanagi and Saito, 1962)	None found
